# Supplementary material for: Health care during electricity failure: The hidden costs
Source: PLoS One. 2020 Nov 4;15(11):e0235760. doi: 10.1371/journal.pone.0235760 (PMC7641375; doi:10.1371/journal.pone.0235760)
Supplement: S3 Data — (XLSX) [file pone.0235760.s004.xlsx]

## Sheet: Sheet1
Iraq	Ghana	Bangladesh	Uganda
339650	31055	23021	2430
711956	118362	94227	17404
1492362	451264	365684	122899
